1 **Managed woodlot revealed a trade-off between edible leaves and timber production in**  
2 ***Vitex doniana* Sweet (Lamiaceae)**

3  
4  
5 Sognigbé N'Danikou\*<sup>1,2</sup>, Dèdéou A. Tchokponhoué<sup>1</sup>, Aristide C. Houdégbé<sup>1</sup>, Aboègnonhou O.C. Agossou<sup>1</sup>,  
6 Enoch G. Achigan-Dako<sup>1</sup>, Françoise Assogba Komlan<sup>3</sup>, Raymond S. Vodouhè<sup>2</sup> and Adam Ahanchédé<sup>1</sup>.

7  
8 <sup>1</sup>Laboratory of Genetics, Biotechnology and Seed Sciences, University of Abomey-Calavi, BP 2549 Abomey-Calavi,  
9 Republic of Benin (SN: [ndanikou@gmail.com](mailto:ndanikou@gmail.com); DAT: [dedeoutchokponhoue@gmail.com](mailto:dedeoutchokponhoue@gmail.com); ACH: [houdariscarl@gmail.com](mailto:houdariscarl@gmail.com);  
10 AOCA: [achaldia.aboegnonhou@gmail.com](mailto:achaldia.aboegnonhou@gmail.com); EGAD: [enoch.achigandako@gmail.com](mailto:enoch.achigandako@gmail.com); AA: [ahanchedeadam@yahoo.fr](mailto:ahanchedeadam@yahoo.fr))

11 <sup>2</sup>Bioversity International, West and Central Africa office, 08 BP 0932, Cotonou, Republic of Benin (SN:  
12 [ndanikou@cgiar.org](mailto:ndanikou@cgiar.org); SRV: [r.vodouhe@cgiar.org](mailto:r.vodouhe@cgiar.org))

13 <sup>3</sup>National Agricultural Research Institute of Benin (INRAB), BP 884 Cotonou, Republic of Benin (FAK:  
14 [fassogbakomlan@gmail.com](mailto:fassogbakomlan@gmail.com))

15 \*Corresponding author's email: [ndanikou@gmail.com](mailto:ndanikou@gmail.com); tel: +229 95122703

16  
17 **Date of submission:** 08 March 2017

18 **Number of tables:** 02

19 **Number of figures:** 11

20 **Word count:** 5,724

21  
22 **Running title:** Growth and development of coppiced and fertilized black plum

23  
24 **Highlights**

25 A clear trade-off between edible leaves and timber production is observed in managed *Vitex*  
26 *doniana* Sweet woodlot. Coppicing as a biotic stress induced important physiological changes  
27 that merit further investigations.

28  
29 **Abstract**

30  
31 *Vitex doniana* Sweet is a major wild-harvested tree resource for food in Benin. However, the  
32 species is under threats characterised by increasing human pressure on remnant populations.  
33 This study represents the first to explore species' response to biotic stress. We tested the  
34 response of *V. doniana* to coppicing and fertilization. Two stump heights (20 and 40 cm) in  
35 combination with three organic manure rates (0.5; 1 and 1.5 kg per seedling), with eight  
36 replicates were tested in a randomised complete block design. We used mixed effect models  
37 with pseudoreplication, and the maximum likelihood method to compare effects of fixed  
38 factors on sprouting vigour, sprout growth and biomass yield in the short (12 months) and  
39 medium (5 years) terms. Results indicated that stump height significantly affected sprouting  
40 and all growth parameters, in the short and medium terms. However, there seemed a delayed  
41 effect of manure. We found initial seedling growth also an important factor. The hidden effect

42 of stump height on biomass yield is discussed. Findings clearly indicate a trade-off between  
43 edible leaves and timber production by managed woodlot. Implications of findings for further  
44 investigation of above and below ground biomass dynamics and resources allocation in  
45 treated trees are discussed.

46 **Keys words:** Benin, Biomass, Coppicing, Domestication, Pruning, *Vitex doniana* Sweet

47 **Abbreviations**

48 CI = Confidence interval

49 DAP = Days after pruning

50 DBH = Diameter at breast height

51 IBSD-C = Initial basal stem diameter before coppicing

52 IBSD-T = Initial basal stem diameter before transplanting

53

54 **1. Introduction**

55 In the optimal foraging theory (OFT) based on the diet breadth model (DBM), domestication  
56 represents stress-based prime-mover models in which “*resource depression justifies the*  
57 *engagement of foragers into management as a response to continued pressure for immediate*  
58 *return of high-ranked resources*” (Zeder 2015). Domestication is suggested when there is  
59 increased demand of natural products that wild-harvesting cannot meet. Thus, economic  
60 demand is thought of to justify the need for domestication (Kupzow 1980). *Vitex doniana*  
61 Sweet (a potential tree crop) is an example of wild-harvested species with a sophisticated  
62 market chain, which provides tangible revenues that support livelihoods of many households  
63 in West Africa, particularly in Benin and Nigeria. However, natural production can no longer  
64 meet the ever-increasing demand. As a consequence, human pressure on wild populations has  
65 increased (Oumorou *et al.* 2010, Agossou 2011, N’Danikou *et al.* 2011).

66 While few studies have investigated regeneration of the species and an important body of  
67 knowledge is generated (Mapongmetsem 2006, Ahoton *et al.* 2011, Sanoussi *et al.* 2012,  
68 Achigan-Dako *et al.* 2014, N’Danikou *et al.* 2014, N’Danikou *et al.* 2015, Mapongmetsem *et*  
69 *al.* 2016), there is a need to explore its horticultural potentials, in order to develop agronomic  
70 packages for future cultivation. In this preliminary investigation, we tested the response of *V.*  
71 *doniana* to cultivation management using stump height, initial stump diameter and  
72 fertilization (organic manure), three important factors for biomass production in horticultural  
73 plants, especially in tree species which are raised for their leaves. In fact, the success of any  
74 biomass plantation highly relies on the sustainability of the coppicing and successive pruning  
75 system (Hytönen 1994). In this line, a number of both intrinsic and external factors affect  
76 stump regeneration among which are stump height, stump diameter, cutting season, cutting  
77 method, site quality, fertilization, spacing, rotation length, and species (Hytönen 1994,  
78 Saifuddin *et al.* 2010). Knowledge of these factors affecting sprouting ability and biomass  
79 yield is necessary to define cutting and harvesting schedules in *V. doniana*. The following  
80 hypotheses formed the basis for our study: H1) stump height, initial stump diameter and  
81 organic manure are important factors that control regrowth and biomass yield in *V. doniana*,  
82 and H2) the applied cultivation treatments to produce edible leaves also affect wood yield in  
83 the species.

84

## 85 2. Material and methods

### 86 2.1. Plant material and experimental design

87 Data were collected on a *Vitex doniana* woodlot raised for 5 years. The trees were obtained  
88 from sexually regenerated seedlings at the Agonkanmey's Research Station of the National  
89 Agricultural Research Institute of Benin (INRAB). We tested species' response to coppicing  
90 at different height and organic manure. Two stump heights (C20 = 20 cm, and C40 = 40 cm  
91 above ground) in combination with three goat manure rates (D1 = 0.5 kg seedling<sup>-1</sup>; D2 = 1 kg  
92 seedling<sup>-1</sup> and D3 = 1.5 kg seedling<sup>-1</sup>), with eight replicates were tested in a randomised  
93 complete block design. In addition to the absolute control (C00), we defined a relative control  
94 (C01) where trees received light thinning by removing all leaves from the main stem and  
95 branches, but not damaging the apical buds. The combination of factors resulted in eight  
96 treatments (Table 1). Seedlings were transplanted at 2 m x 2 m spacing (2,500 stems ha<sup>-1</sup>), and  
97 in staggered rows. There were eight blocks in total and each block of 16 m<sup>2</sup> comprised eight  
98 plants. Seedlings were transplanted after they were raised for five months in nursery. Due to  
99 the fact that seed germination in *V. doniana* was stochastic at the time of this experiment,  
100 seedlings produced were of different ages and heights. To account for this difference in initial  
101 growth of transplanted seedlings, we defined height ranges and seedlings with dominant  
102 heights were first randomized in the rows, followed by shorter ones. With the limited number  
103 of available seedlings, due to the reason given above, the effect of other factors such as  
104 planting density and pruning frequency could not be tested in this study. Soil at the  
105 experimental site was homogenous and water supply was assumed to be optimal.

### 106 2.2. Measurements and data analysis

107 Height of saplings (from transplanting up to three months), basal stem diameter of trees,  
108 number and height of sprouts after each pruning, total wet biomass and dry weight of edible  
109 biomass were monitored on temporal basis, over 12 months. Other growth parameters such as  
110 basal stem diameter, diameter at breast height (DBH), number of root suckers, number of  
111 branches below 0.2 m, 0.4 m, and below 1.3 m above ground, were recorded when the  
112 managed woodlot was three years and five years old.

113 A total of four prunings were performed on trees that were clear cut at different heights, and  
114 six series (every ten days) of measurements of the above parameters were recorded on each  
115 tree after each pruning. Pruning was not used as a factor in the current study, but a method to

116 harvest foliage and allow for regeneration. Each series of measurement lasted two months.  
117 Thus, we collected 24 series (4 prunings x 6 measurements) of growth data and four biomass  
118 yield data over 12 months. DBH was measured only on three years and five years old trees.  
119 We used mixed effects models with pseudo-replication to account for temporal  
120 autocorrelation across repeated measures on the same trees, and the maximum likelihood  
121 method to test the effects of fixed factors (height of pruning and manure application) and  
122 random effect (date of measurement, and number of harvest) on the different growth and yield  
123 parameters (main stem's basal diameter and DBH, the number and growth of new shoots, the  
124 number of branches below cutting points and below 1.30 m, and the quantity of edible  
125 biomass). We also tested effect of the initial basal stem diameter (IBSD-C), measured just  
126 before applying the treatments. Selecting the best models that explain the maximum of the  
127 variability observed in data, the main effect of IBSD-C was compared to its random effect and  
128 this for all response variables. All statistical analyses were performed using R software (The  
129 R Core Team 2013).

130

### 131 **3. Results**

#### 132 *3.1. Survival of V. doniana to transplantation and to cultivation management*

133 All *V. doniana* seedlings survived after transplantation and also to cultivation management.  
134 After three months and before treatments were applied, height of saplings varied between 43  
135 cm to 152 cm (Figure 1). On average, seedlings with bigger initial basal stem diameter at  
136 transplanting (IBSD-T) grew better in height than thinner seedlings. Thinner seedlings (IBSD-  
137  $T \leq 8$  cm) reached  $89.00 \pm 25.83$  cm high, compared with  $99.87 \pm 24.51$  cm for medium size  
138 ( $8 > \text{IBSD-T} < 10$  cm) and  $114.42 \pm 17.43$  cm for bigger seedlings ( $\text{IBSD-T} \geq 10$  cm). Data  
139 also indicated a linear relationship between stem diameter and height growths, in three  
140 months old saplings (Figure 2). The variance analysis indicated a very significant effect of  
141 initial collar diameter at transplanting on saplings' growth in height ( $p < 0.05$ ). Saplings'  
142 height increased with increasing IBSD-T.

143 After five years, the survival rate is 100% in both the control trees and in the trees that  
144 received cultivation treatments. Data also showed that *V. doniana* is also a fast growing  
145 species with the diameter at breast height (DBH) of untreated trees reaching 11.67 cm ( $6.24 \pm$   
146  $2.60$  cm in average) in three years, and 14.65 cm DBH ( $9.10 \pm 3.01$  cm in average) in five

147 years old trees. The prediction based on the allometric relationship between height and  
148 diameter indicated that under plantation conditions (regular weeding and need-based  
149 irrigation) non-coppiced *V. doniana* trees reached confidence interval CI: 2.18 m – 5.89 m  
150 (4.14 m in average), and CI: 2.72 m – 7.73 m (5.36 m in average) in three and five years,  
151 respectively.

### 152 3.2. *Effects of clear-cutting, manure application and initial stem growth on trees'* 153 *sprouting capacity and biomass production in the short term*

#### 154 3.2.1 Sprouts growth in height

155 Overall, height of three months old sprouts varied between 20.0 cm and 172.0 cm. The lowest  
156 height was obtained in sprouts growing on short stumps while the highest values were  
157 recorded on high stumps, all manuring rates considered. On average sprouts from high stumps  
158 had higher height compared to those that grew on short stumps, while no linear effect of  
159 manure is perceptible (Figure 3). Within each treatment sprouts seemed to show relatively  
160 similar height growth after each pruning. The deviance analysis showed that stump height had  
161 significant effect on sprouts' growth in height ( $p < 0.05$ ), while the effects of manure and  
162 IBSD-C were not significant ( $p > 0.05$ ). Thus, we inferred that after each pruning sprouts  
163 height increased with increased stump height.

#### 164 3.2.2 Basal stem diameter

165 Data indicated that irrespective of manure rate, basal stem diameter of mother stand was  
166 higher in high stumps (Figure 4). In average, basal stem diameter growth increment ranged  
167 from 1.09 mm to 1.14 mm in 20 cm stump height, while it ranged from 1.26 mm to 1.49 mm  
168 in trees with 40 cm stump height. It appeared that higher stumps (40 cm above ground) grew  
169 better in basal diameter compared to shorter stumps (20 cm above ground), irrespective of  
170 manure application. It is also noticed that in average the basal stem diameter growth speed  
171 was higher in the first 15 days after pruning (DAP), and then gradually decreased for all  
172 treatments, till 45 DAP. From 60 DAP we recorded a new increase in the diameter growth  
173 rate. The deviance analysis indicated that stem basal diameter significantly increased with  
174 increased pruning height ( $p < 0.05$ ), while manure application did not show any significant  
175 effect ( $p > 0.05$ ), as shown in Figure 2. There was also no significant interaction effect of  
176 stump height and manure application rate on basal stem diameter ( $p \geq 0.05$ ).

#### 177 3.2.3 Production and growth of sprouts

178 Results indicated that between two pruning periods, the number of sprouts produced increased  
179 over time (Figure 5). The number of sprouts produced after each pruning varied between 0  
180 and 12 (4 sprouts in average). It was observed that while short stumps continued to produce  
181 new sprouts for harvest till the 60<sup>th</sup> DAP (perceptible with C20D1), higher stumps hardly  
182 produced new shoots after 30 DAP. The number of shoots produced also seemed to vary with  
183 manure rate, with the highest shoots obtained in trees that received 0.50 kg of manure.  
184 However, from the graphic there seemed to be no linear effect of manure rate on the number  
185 of shoots that were produced, as trees that received higher manure rates (D2 and D3)  
186 produced less shoots compared to those which received low manure dosage.

187 The deviance analysis indicated significant effects of coppicing ( $p < 0.05$ ) and IBSD-C ( $p <$   
188  $0.001$ ) on the number of sprouts, while the effect of manure application was not significant ( $p$   
189  $> 0.05$ ). There was a significant two-way interaction effects between stump height and IBSD-  
190 C ( $p < 0.001$ ), and between ISBD and manure ( $p < 0.001$ ) on the number of sprouts, while the  
191 interaction between stump height and manure was not significant ( $p > 0.05$ ). The three-way  
192 interaction effect between factors was also significant ( $p < 0.001$ ). It is therefore concluded  
193 that the number of sprouts increased with the increase of initial basal stem diameter before  
194 clear-cutting (Table 2), while it decreased with stump height. Short stumps with IBSD-C  $\geq 3$   
195 cm produced higher number of sprouts, even with low manure rate.

196 Within 60 days twigs length varied between 0.40 cm and 104.80 cm, when considering all  
197 treatments (Figure 6). Overall, the mean length was higher in all twigs that sprouted on high  
198 stumps, irrespective of the manure rate. The deviance analysis indicated that among the tested  
199 factors, only stump height had significant effect on twigs growth ( $p < 0.05$ ), while no  
200 significant effects of goat manure and IBSD-C were observed ( $p > 0.05$ ). There were  
201 significant 2-way interaction effects between stump height and manure, stump height and  
202 IBSD, and between manure and IBSD-C ( $p < 0.05$ , in all cases). We concluded that twigs  
203 growth increased with increased stump height. On short stumps, sprouts grew faster when  
204 IBSD-C is small ( $< 25$  cm), while on higher stumps, sprouts grew faster when IBSD-C is big  
205 ( $\geq 30$  cm).

#### 206 3.2.4 Edible biomass

207 Overall, dry matter varied from 0.98 g to 12.98 g per plant, equivalent to 2.45 kg to 32.45 kg  
208 per hectare per harvest. The highest yield was obtained in the first harvest. *Vitex doniana*  
209 leaves contained in average 32% dry matter per 100 g of edible portion. The quantity of edible

210 dry matter also decreased over time, to become very low after three harvests (Figure 7). In the  
211 first harvest after clear-cutting, biomass produced by short stumps, regardless the amount of  
212 manure applied, was slightly higher than that by high stumps. However, the reverse was  
213 observed after the second and third harvests where biomass produced by shorter stumps was  
214 lower compared with that measured in high stumps, this irrespective of the manure dosage.  
215 Biomass yield in short stumps was 8.8% less in the second and 127% less in the third harvest,  
216 respectively. It's worth indicating that the last harvest coincided with the period of lowest  
217 rainfall in the year (January). Nonetheless, deviance analysis indicated there is no significant  
218 effect of coppicing and manure application on the dry matter produced ( $p > 0.05$ ). In addition,  
219 a very significant difference was noted in the amount of dry matter over a period of three  
220 harvests ( $p < 0.001$ ). Biomass decreased with increased harvest. It was also found a marginal  
221 interaction effect between stump height and number of harvests on biomass yield ( $p = 0.07$ ).

### 222 3.3. *Effects of cultivation management in the medium term*

#### 223 3.3.1. Diameter at breast height

224 Overall, the DBH ranged from 0.66 cm to 11.67 cm in three years old trees, and 0.95 cm to  
225 14.65 cm in five years old trees. In average, the DBH was higher in the control ( $6.24 \pm 2.60$   
226 cm and  $9.10 \pm 3.01$  cm in three and five years old trees, respectively) (Figure 8). Smaller  
227 DBH were recorded in sprouts that grew from short stumps ( $3.00 \pm 1.91$  cm and  $4.68 \pm 2.45$   
228 cm in three years and five years old trees, respectively). The deviance analysis showed that  
229 only stump height significantly affected DBH ( $p < 0.001$ ), while the main effects of manure  
230 ( $p > 0.05$ ), and initial basal diameter before clear-cutting ( $p = 0.08$ ) on DBH were not  
231 significant. There were significant two-way interaction effects between stump height and  
232 manure, and between manure and IBSD-C ( $p < 0.05$ , in all cases). However, the interaction  
233 between stump height and IBSD-C was not significant ( $p = 0.07$ ). We concluded that DBH  
234 increased with increased stump height and with decreased manure rate, and also with  
235 increased IBSD. It was also found that DBH of trees that received light thinning (C01D0) was  
236 not significantly different from the absolute control ( $p > 0.05$ ).

#### 237 3.3.2. Basal stem diameter

238 Stem basal diameter of the absolute control trees (D0C00) was in average  $11.05 \pm 2.36$  cm  
239 and  $14.33 \pm 3.18$  cm, for three years old and five years old trees, respectively. Trees that  
240 received light thinning (C01) showed a slightly lower stem growth;  $10.21 \pm 2.17$  cm and



241 13.47 ± 4.19 cm in three years and five years old trees, respectively. Overall, slower diameter  
242 growth was observed in stumped trees which showed lower basal stem diameter (Figure 9).  
243 Deviance analysis indicated a very significant effect of stump height and IBSD-C on basal  
244 stem diameter after five years ( $p < 0.01$ , in both cases), while the effect of manure was not  
245 significant ( $p > 0.05$ ). There were also significant two-way interaction effects between stump  
246 height and manure, stump height and IBSD-C, and between manure and IBSD-C ( $p < 0.05$ , in  
247 all cases), while no significant three-way interaction effect was observed. We inferred that  
248 basal stem diameter increased with increased stump height and with decreased manure rate.  
249 Overall, stumps with big IBSD-C relatively grew faster.

### 250 3.3.3. Production of branches

251 Overall the number of branches on *V. doniana* trees increased from the ground to the top of  
252 tree (Figure 7). The trend indicated that the trees which received cultivation management  
253 treatments continued to produce relatively higher number of branches below cutting points  
254 (Figure 10 A and B) and below 1.30 m (Figure 10 C), irrespective of their initial basal stem  
255 diameter before clear-cutting. Overall, the number of branches in total increased from three  
256 years old to five years old. However, there were more branches below 1.30 m and below  
257 cutting points in three years old sprouts compared to in five years old ones. The deviance  
258 analysis indicated that three years after treatments were applied there is still a significant  
259 effect of stump height on the number of branches below the cutting points of 0.20 m and 0.40  
260 m, and on the total number of branches ( $p < 0.05$ , in all cases). The effect of IBSD-C was  
261 significant only on the number of branches below 0.20 m ( $p < 0.05$ ). The main effect of  
262 manure application was not statistically significant in any case. Nonetheless, there were  
263 significant two-way interaction effects between stump height and manure, stump height and  
264 IBSD-C, and between manure and IBSD-C, though only on branching below 0.20 m ( $p <$   
265 0.05, in all cases). Results therefore indicated that the number of branches produced by three  
266 years old trees increased with decreased stump height and with increased manure rate. The  
267 number of branches also increased with increased IBSD-C.

### 268 3.3.4. Production of root suckers

269 The average number of root suckers produced by three years old trees was higher in control  
270 treatments compared with coppiced and fertilized trees (Figure 11). It is also observed that the  
271 average number of root suckers decreased in five years old trees. High stumps with big IBSD-  
272 C irrespective of manure rate produced relatively higher number of root suckers. The

273 deviance analysis indicated a significant effect of stump height on the number of root suckers  
274 produced by three years old trees ( $p < 0.05$ ), while the effects of manure and IBSD-C were  
275 not significant ( $p > 0.05$ ). The interaction effects were not significant. We therefore concluded  
276 that the number of root suckers increased with increased stump height.

## 277 **4. Discussion**

### 278 *4.1 Growth and development*

279 Our study represents the first to investigate *V. doniana* growth and development in plantation.  
280 The findings indicated that it is a fast growing species, with height of non-coppiced trees  
281 ranging between CI: 2.17-5.89 m (4.14 m in average) three years after transplantation. Five  
282 years plantation trees reached between CI: 2.72-7.73 m high (5.36 in average). These values  
283 are by far superior to the 1.70 m reported by Ky (2008), though this latter value likely referred  
284 to wild populations. DBH of untreated trees ranged between CI: 2.60-11.7 cm (average 6.24  
285 cm) and CI: 4.46-14.65 cm (average 9.10 cm) in three and five years, respectively. These  
286 values of DBH are comparable to that of *Tectona grandis* Lf, another commercial timber  
287 species of the Lamiaceae family, where mean quadratic circumference of young plantation  
288 trees (below 5 years) was  $23,13 \pm 0,62$  cm (ca. 5.43 cm DBH), in Southern Benin (Atindogbe  
289 *et al.* 2012). Most interesting, non-coppiced five years *V. doniana* trees showed higher DBH  
290 compared with the  $29,67 \pm 1,21$  cm circumference (ca. 6.15 cm DBH) of high teak plantation  
291 forest of more than five years old (Atindogbe *et al.* 2012). Taking into account that *V.*  
292 *doniana* timber has physical properties closely comparable to that of *T. grandis*, (Makonda *et*  
293 *al.* 2016) the former represents a potential commercial multi-purpose tree crop.

### 294 *4.2 Coppicing to promote sprouting, sprout growth and biomass production*

295 The main product collected on *V. doniana* is its young leaves used for vegetable. Therefore,  
296 the effects of agronomic techniques on leaves production in horticultural systems are  
297 important to investigate. Our results indicated that stump height is crucial for sprouting  
298 intensity, with short stumps producing more sprouts than higher ones. This response was  
299 reported in some species, and was partly explained by the fact that short stumps are more  
300 likely to be connected with the roots which increases the availability of water and metabolites  
301 that are needed in sprouting-buds (Hytönen 1994, Wilson 1994, Thomas and Schiefelbein  
302 2004). It was also reported that removal of leaf area significantly affects the ability of  
303 sprouting, sprouts growth and root formation (Wilson 1988, Wilson 1994, Paukkonen and

304 Kauppi 1998, Thomas and Schiefelbein 2004, Dharmakeerthi *et al.* 2008, Saifuddin *et al.*  
305 2010). Partial or total removal of the above-ground biomass of trees can result in interruption  
306 of root growth or partial death in the root system (Berninger and Salas 2003, Dharmakeerthi  
307 *et al.* 2008). Leaves removal is assumed to be detrimental to root formation because they  
308 supply root promoters such as indole 3-acetic acid (IAA), auxin and other rooting cofactors,  
309 vitamins, carbohydrates, organic nitrogen (Wilson 1988, Hartmann *et al.* 2011). Thus, greater  
310 the leaf area, the better the root and shoot growth. This explains that leafy stumps and cuttings  
311 are likely to promote more roots and shoot growth than leafless stumps. In addition, high  
312 (leafy) stumps had larger number of buds and thus stronger sink activity which would  
313 therefore increase the metabolic activity and health of leaves. Leaves will then continue to  
314 supply photosynthates and rooting cofactors (Thomas and Schiefelbein 2004). Our findings  
315 are consistent with this observation where (leafless) 20 cm stumps, although producing higher  
316 number of sprouts, did not result in better growth compared with higher (more leafy) stumps.  
317 In our experiment coppicing should have induced a slow growth in root biomass, and with  
318 more severe effect on short stumps' root system development. The sprouts which developed  
319 on stumps with more vigorous root system (40 cm stumps) will, over time, likely grow faster  
320 compared with sprouts that developed on stumps with poor root growth (20 cm stumps). The  
321 same trend was described for walnut tree (Balandier *et al.* 2000) and *Eucalyptus* (Wilson  
322 1988, Wilson 1994), where increased reduction of leaf area reduced rooting and sprouts  
323 growth. This is in agreement with theories on balanced growth in plants (Davidson 1969). It  
324 means that coppicing or pruning modifies the shoot-root ratio and the response of affected  
325 trees is either the quick activation of sprout-producing buds to trigger the photosynthetic  
326 activity at the expense of other organs such as roots (case of leafless short stumps) or, when at  
327 all possible, to prioritize the supply of rooting cofactors and carbohydrates to sustain roots'  
328 function (case of leafy high stumps). The effect of stump height on sprouting is also partially  
329 attributed to the location of sprout-producing buds on the main stem (Hytönen 1994). It is  
330 observed in *V. doniana* that the number of buds increased with the stem segment considered.  
331 The last bottom segment of stem (close to ground) has more sprout-producing buds than  
332 upper segments. In line with the above, the low number of root suckers observed in stumped  
333 trees can be explained by the reduced growth of their root systems.

334 In the majority of cases reported, biomass increased with increased stump and pruning height  
335 (Yasui and Fujie 1971, Tipu *et al.* 2006, Saifuddin *et al.* 2010). Nonetheless, although rare,  
336 the opposite was also reported in some species (Hytönen 1994). Conceptually, biomass yield

337 is known to be affected by the amount of available carbohydrates for the growing trees  
338 (Berninger *et al.* 2000, Berninger and Salas 2003). Therefore, the most plausible scenario in  
339 our study would be that more leafy stumps (here high stumps) would produce higher biomass  
340 compared with leafless stumps (short stumps). However, the effect of stump height on  
341 biomass may not be conclusive after only one rotation experiment. Our results indicated that  
342 biomass was higher in short stumps at the first harvest after coppicing, and then the trend  
343 changed in the subsequent harvests, where high stumps now produced higher biomass  
344 throughout the rest of experiment. Also, the data reported in this study represents only one  
345 rotation and this could explain our finding that there was no significant effect of stump height  
346 on dry biomass for the first rotation. The season of coppicing also affects biomass production  
347 by coppiced trees in many species, with the dormant season being more favourable for the  
348 harvest of protein-rich leaves (Hytönen 1994). Decline in biomass production within a  
349 rotation can also be due to the frequency of harvest. High harvesting frequency also led to  
350 rapid decrease in biomass production (Hytönen and Issakainen 2001, Saifuddin *et al.* 2010).  
351 In our study, *V. doniana* was harvested every two months and could explain the rapid decline  
352 of biomass yield from one harvest to the next. Although seasonality was not assessed in the  
353 current trial, the decline in biomass (dry matter) yield could also be due to the season in which  
354 trees were harvested. In fact, the last harvest happened in the driest month and reduced water  
355 availability could explain the low yield.

#### 356 *4.3 Ambiguous effect of organic manure on growth and yield of indigenous trees*

357 Response of indigenous tree species to organic manure varied with species and soil quality.  
358 While a beneficial effect of poultry manure on growth and yield parameters was noted in  
359 some plantation species such as *Theobroma cacao* L. (Orozco and Thienhaus 1997), sole  
360 application of poultry and farmyard manure had no significant effect on Balady mandarin tree  
361 (*Citrus reticulata* Blanco) where an increase of manure rates decreased all growth and yield  
362 parameters (Gamal and Ragab 2003). Also, no growth and yield difference was obtained with  
363 increased fresh and processed poultry manure application on fruit bearing and non-bearing  
364 citrus trees (Ferguson 1994). Besides, some indigenous species showed no response to either  
365 organic or inorganic manure. This is the case of *Uapaca kirkiana* Müll.Arg. and *Sclerocarya*  
366 *birrea* (A.Rich.) Hochst. where application of compost, chemical fertilizer and dry-season  
367 irrigation did not increase early growth and survival of plants (Akinnifesi *et al.* 2008). In our  
368 study, an increase of goat manure rate did not improve sprouting nor growth and yield

369 parameters in *V. doniana*, in the short term. Within the first 12 months we observed that  
370 stumps that received 0.5 kg of manure produced relatively higher number of sprouts  
371 compared with those that received 1 kg and 1.5 kg of manure, though the difference was not  
372 statistically significant. This negative effect of organic manure on growth parameters was  
373 reported on *T. cacao* where even in combination with inorganic fertilizer, a ratio above 50%  
374 organic manure decreased growth and yield (Gamal and Ragab 2003). Best survival and  
375 growth was also observed in *S. birrea* trees that did not received any management treatments  
376 (Akinnifesi *et al.* 2008). This corroborates our finding where trees of the control treatments  
377 showed better stem growth (basal stem diameter and DBH). Nonetheless, the fact that in three  
378 and five years old trees, though not statistically significant, the number of branches relatively  
379 increased with increased manure rate could indicate a delayed uptake of organic manure by  
380 the species. Overall, our hypothesis 1 is partially rejected and we conclude that organic  
381 manure may not be a factor that control regrowth of coppiced trees.

#### 382 *4.4 Trade-off between leaves and timber production by managed V. doniana woodlot*

383 Findings indicated that coppicing and subsequent pruning allowed for more sprouts  
384 development which can be harvested for consumption, in the short but also in the medium  
385 term. This confirms partially our hypothesis 1 that stump height is an important factor for  
386 growth and biomass yield in *V. doniana*. In fact, coppiced trees continued to produce more  
387 branches at lower height (below 0.40 m) compared with control treatments. This impact of  
388 coppicing on plant's architecture represents an advantage for horticulture prospects, because  
389 *V. doniana* is a big tree when fully developed. In the meantime, it was also observed that  
390 coppiced trees to produce edible leaves had the lowest DBH, compared with control  
391 treatments. This finding confirms our hypothesis 2 that the applied cultivation treatments to  
392 produce edible leaves affect wood yield in the species. The drastic reduction of stem growth  
393 in those trees intensively harvested for their leaves clearly indicates a trade-off that should be  
394 taken into account in production objectives. Simulation studies using growth models have  
395 showed that frequent pruning lead to depletion of reserve carbohydrates in the stems  
396 (Berninger *et al.* 2000). Therefore, leaves will be produced at the expense of stem growth.  
397 This result implies that natural stands that are intensively harvested in the nature are subject to  
398 decline, due to reduced growth which will affect their reproductive capacity. However, though  
399 coppicing affected timber stock, the coppiced and frequently pruned trees can yield a  
400 substantial quantity of firewood, which was not measured in the current study.

#### 401        4.5 Implications for research

402        Our study showed contrasting effects of stump height on sprouting vigour and on sprout  
403        growth, and could justify the hardly perceptible effect of stump height on biomass yield. It  
404        implies that stump height represents an important factor for the species' functional structure  
405        and partially confirms our hypothesis 1 that stump height is an important factor for growth  
406        and biomass yield in *V. doniana*. The contrasting effect of stump height indicates a  
407        modification of resources allocation and net photosynthesis. The fact that basal stem diameter  
408        growth rate decreased in the first 45 DAP and then started to increase only at 60 DAP  
409        supports that coppicing modifies resources allocation among plant organs. In the first 45  
410        DAP, coppiced trees invested more resources in sprouting and sprouts growth in length than  
411        in main stem growth in diameter. Indeed, this should be taken into account in further research  
412        aiming at simulating the species' response to cultivation management, especially to pruning  
413        because it modifies architecture, leaf area and consequently photosynthetic processes and crop  
414        yield (Marcelis *et al.* 1998, Balandier *et al.* 2000).

415        In addition, further research should identify the exact distance from which the inhibitory  
416        effect of apical buds is suppressed to allow better sprouting and biomass yield. In fact,  
417        pruning breaks the inhibitory correlations among tree organs. Removing the top of tree  
418        therefore releases the latent buds that develop into new shoots that can be harvested.  
419        However, there is a distance over which pruning can suppress this complex inhibitory  
420        relationship (Balandier *et al.* 2000). The two stump heights tested in this study suppressed this  
421        inhibitory effect and there is need to test low and higher heights.

422        Further studies are also needed to determine the dynamic of shoot-root ratio in coppiced trees.  
423        It is known that coppicing and pruning modify the shoot-root ratio (Balandier *et al.* 2000).  
424        The physiological response to coppicing is the modification of tree growth to restore this  
425        equilibrium between above and below-ground biomass. This explains our finding that short  
426        stumps (higher defoliation) quickly produced higher number of new sprouts to restore this  
427        equilibrium. However, the amount of reserve carbohydrates and photosynthetic capacities of  
428        subjects determine the speed at which the stumped trees will grow. This differential  
429        availability of reserves explains why leafy high stumps grew better and tended to continue  
430        producing higher biomass, even with increased pruning frequency. Also, the low suckering  
431        capacity observed in coppiced trees indicated that clear-felling as harvesting practice reduces  
432        regeneration from rootstock. It implies that this practice which is observed in the natural



433 vegetation (Agossou 2011, N'Danikou *et al.* 2011), will heighten the already existing threat,  
434 as fruiting ability is already reduced by leaves harvests.

435 Findings also indicated that almost all growth parameters increased with initial stem growth.  
436 Comparing the effect of initial stem growth as fixed factor and then as random factor, results  
437 of the deviance analysis indicated that the effect of IBSD-C cannot be ignored when  
438 randomizing the plants in blocks.

439 Economic studies are also required to evaluate the profitability of this potential plantation  
440 crop. As a wild-harvested resource, the majority of farmers will engage in the cultivation of *V.*  
441 *doniana* when there is a clear demonstration of its profitability. In this end, robust  
442 environmental economics and crop yield models would be necessary to determine the  
443 opportunity cost of *V. doniana* commercial plantation. Furthermore, comparative studies  
444 would be desired to determine the profitability of a dual purpose *V. doniana* plantation or  
445 agroforestry. In fact, our study revealed a trade-off between leaves and wood production by  
446 the coppiced trees. However, a stock of firewood or construction poles can be obtained  
447 between two rotation cycles devoted to leaves production.

448 Finally, biochemical studies are required to compare the nutritional quality of the cultivated  
449 versus wild-harvested leaves of *V. doniana*. Apparently the harvested and cooked leaves  
450 during the experiment presented similar taste to the wild-harvested, but this should be tested  
451 in a formal nutrition protocol.

## 452 **5. Conclusion**

453 The study investigated the effects of coppicing and goat manure application on growth and  
454 yield parameters in *V. doniana*. Findings clearly indicated a significant effect of stump height  
455 and diameter on production and growth of sprouts, while the effect of goat manure was not  
456 prominent. Furthermore, there was a very clear trade-off between production of edible leaves  
457 and timber production by the coppiced and periodically pruned trees. Coppicing also reduced  
458 formation of root suckers. We concluded that coppicing can be applied to *V. doniana* saplings  
459 with 3 cm basal stem diameter or more, and cutting point should not be lower than 40 cm  
460 above ground, in order to maximize sprouts growth and biomass yield. The effect of manure  
461 on sprouting and biomass yield should be confirmed in further studies. It is also vital to  
462 evaluate the effect of treatments on fruiting ability of trees. So far this study is the first of its  
463 type in determining the effects of cultivation management on yield of edible biomass, and

464 should serve as background for future investigations towards domestication of *V. doniana* in  
465 West Africa.

#### 466 **Competing interests**

467 The authors declare that they have no competing interests.

#### 468 **Author's contributions**

469 SN conceived and designed the study, performed data analysis, wrote and finalized the  
470 manuscript. DAT designed and collected data, read and improved the manuscript. COAA and  
471 CAH contributed to data gathering, read and improved the manuscript. EGAD gave  
472 conceptual advice, read and critically reviewed the manuscript. FAK, RSV and AA gave  
473 conceptual advice, read and critically reviewed the manuscript. AA gave final approval of the  
474 article. All authors read and approved the final manuscript.

#### 475 **Funding sources**

476 Funding: This work was supported by New Alliance Trust [Grant # RGNAT04/12].

477 New Alliance Trust was not involved in study design; in the collection, analysis and  
478 interpretation of data; in the writing of the report; and in the decision to submit the article for  
479 publication.

#### 480 **Acknowledgements**

481 Authors are grateful to the National Agricultural Research Institute of Benin (INRAB) for  
482 providing the land and labour force for the experiment.

## 6. References

- Achigan-Dako EG, N'Danikou S, Tchokponhoue AD, Assogba-Komlan F, Larwanou L, Vodouhe SR, Ahanchede A.** 2014. Sustainable use and conservation of *Vitex doniana* Sweet: unlocking the propagation ability using stem cuttings. *Journal of Agriculture and Environment for International Development*, **108**,43-62.  
<https://dx.doi.org/10.12895/jaeid.20141.195>
- Agossou OAC.** 2011. Pressions anthropiques et stratégies locales de domestication de *Vitex doniana* Sweet dans la commune de Djidja au sud Bénin. Mémoire de Licence. Université d'Abomey-Calav, Faculté des Sciences Agronomiques.



- Ahoton LE, Adjakpa JB, Gouda M, Dainou O, Akpo EL.** 2011. Effet des prétraitements de semences du prunier des savanes (*vitex doniana sweet*) sur la germination et la croissance des plantules. *Annales des Sciences Agronomiques*, **15**.
- Akinnifesi FK, Mhango J, Sileshi G, Chilanga T.** 2008. Early growth and survival of three miombo woodland indigenous fruit tree species under fertilizer, manure and dry-season irrigation in southern Malawi. *Forest ecology and Management*, **255**,546-557. <http://dx.doi.org/10.1016/j.foreco.2007.09.025>
- Atindogbe G, Fonton NH, Fandohan B, Lejeune P.** 2012. Caractérisation des plantations privées de teck (*Tectona grandis* Lf) du département de l'Atlantique au Sud-Bénin. *Biotechnologie, Agronomie, Société et Environnement*, **16**,441-451.
- Balandier P, Lacoïnte A, Le Roux X, Sinoquet H, Cruiziat P, Le Dizès S.** 2000. SIMWAL: a structural-functional model simulating single walnut tree growth in response to climate and pruning. *Annals of Forest Science*, **57**,571-585. <https://doi.org/10.1093/oxfordjournals.aob.a084308>
- Berninger F, Nikinmaa E, Sievänen R, Nygren P.** 2000. Modelling of reserve carbohydrate dynamics, regrowth and nodulation in a N<sub>2</sub>-fixing tree managed by periodic prunings. *Plant, Cell & Environment*, **23**,1025-1040. <http://dx.doi.org/10.1046/j.1365-3040.2000.00624.x>
- Berninger F, Salas E.** 2003. Biomass dynamics of *Erythrina lanceolata* as influenced by shoot-pruning intensity in Costa Rica. *Agroforestry Systems*, **57**,19-28. <http://dx.doi.org/10.1023/A:1022910310082>
- Davidson R.** 1969. Effect of root/leaf temperature differentials on root/shoot ratios in some pasture grasses and clover. *Annals of Botany*, **33**,561-569. <https://doi.org/10.1093/oxfordjournals.aob.a084308>
- Dharmakeerthi RS, Senevirathna AMWK, Edirimanne VU, Chandrasiri JAS.** 2008. Effect of stock pruning on shoot and root growth of budded polybag plants of *Hevea brasiliensis*. *Natural Rubber Research*, **21**,24-31. <http://dx.doi.org/10.1186/2193-1801-1-84>
- Ferguson JJ.** 1994. Growth and yield of bearing and non-bearing citrus trees fertilized with fresh and processed chicken manure. *Proceedings of the Florida State Horticultural Society*, **107**,29-32.

- Gamal AM, Ragab MA.** 2003. Effect of organic manure source and its rate on growth, nutritional status of the trees and productivity of Balady mandarin trees. *Assiut Journal of Agricultural Sciences*, **34**,253-264.
- Hartmann HT, Kester DE, Davies FT, Geneve RL** (Eds.). 2011. *Plant propagation: principles and practices*, 8th edition edition. Prentice-Hall, Englewood Cliffs.
- Hytönen J.** 1994. Effect of cutting season, stump height and harvest damage on coppicing and biomass production of willow and birch. *Biomass and Bioenergy*, **6**,349-357. [http://dx.doi.org/10.1016/0961-9534\(94\)E0029-R](http://dx.doi.org/10.1016/0961-9534(94)E0029-R)
- Hytönen J, Issakainen J.** 2001. Effect of repeated harvesting on biomass production and sprouting of *Betula pubescens*. *Biomass and Bioenergy*, **20**,237-245. [http://dx.doi.org/10.1016/S0961-9534\(00\)00083-0](http://dx.doi.org/10.1016/S0961-9534(00)00083-0)
- Kupzow A.** 1980. Theoretical basis of the plant domestication. *Theoretical and Applied Genetics*, **57**,65-74.
- Ky KJM.** 2008. *Vitex doniana* Sweet. in *Prota 7(1): Timbers/Bois d'oeuvre 1* (Loupe D, Oteng-Amoako AA, Brink M eds.). pp. 578–581. PROTA Foundation, Wageningen, Pays Bas: Backhuys Publishers, Leiden, / CTA, Wageningen:578–581.
- Makonda F, Kitojo D, Augustino S, Ruffo C, Ishengoma R, Gillah P, Eriksen S, Msanga H.** 2016. *Vitex doniana* Sweet: a potential lesser-known and lesser utilized agro-forestry timber species in Kilosa district, Morogoro Tanzania. *International Journal of Contemporary Applied Sciences*, **3**,100-113.
- Mapongmetsem PM.** 2006. Domestication of *Vitex madiensis* in the Adamawa Highlands of Cameroon: Phenology and Propagation. *Akdeniz üniversitesi ziraat fakültesi dergisi*, **19**,269-278.
- Mapongmetsem PM, Fawa G, Noubissie Tchiagam J-B, Nkongmeneck B-A, Biaou SH, Bellefontaine R.** 2016. Vegetative propagation of *Vitex doniana* Sweet from root segments cuttings. *Bois et Forêts des Tropiques*, 29-37.
- Marcelis LFM, Heuvelink E, Goudriaan J.** 1998. Modelling biomass production and yield of horticultural crops: a review. *Scientia Horticulturae*, **74**,83-111. [http://dx.doi.org/10.1016/S0304-4238\(98\)00083-1](http://dx.doi.org/10.1016/S0304-4238(98)00083-1)
- N'Danikou S, Achigan-Dako EG, Tchokponhoue AD, Assogba Komlan F, Vodouhe SR, Ahanchede A.** 2015. Improving seedling production for *Vitex doniana*. *Seed Science and Technology*, **43**,10-19. <http://doi.org/10.15258/sst.2015.43.1.02>

- N'Danikou S, Achigan-Dako EG, Tchokponhoué DA, Assogba Komlan F, Gebauer J, Vodouhè RS, Ahanchédé A.** 2014. Enhancing germination and seedling growth in *Vitex doniana* Sweet for horticultural prospects and conservation of genetic resources. *FRUITS*, **69**,279–291. <http://dx.doi.org/10.1051/fruits/2014017>
- N'Danikou S, Achigan-Dako EG, Wong JLG.** 2011. Eliciting Local Values of Wild Edible Plants in Southern Bénin to Identify Priority Species for Conservation. *Economic Botany*, **65**,381-395.
- Orozco M, Thienhaus S.** 1997. The effect of three rates of chicken manure on the growth and development of cocoa (*Theobroma cacao* L.) trees. *Agronomia Mesoamericana*, **8**,81-92.
- Oumorou M, Sinadouwirou T, Kiki M, Glele Kakaï R, Mensah G, Sinsin B.** 2010. Disturbance and population structure of *Vitex doniana* Sweet. in northern Benin, West Africa. *International Journal of Biological and Chemical Sciences*, **4**,624-632.
- Paukkonen K, Kauppi A.** 1998. Effect of coppicing on root system morphology and its significance for subsequent shoot regeneration of birches. *Canadian Journal of Forest Research*, **28**,1870-1878. [10.1139/cjfr-28-12-1870](https://doi.org/10.1139/cjfr-28-12-1870)
- Saifuddin M, Hossain ABMS, Osman N, Sattar MA, Moneruzzaman KM, Jahirul MI.** 2010. Pruning impacts on shoot-root-growth, biochemical and physiological changes of *Bougainvillea glabra*. *Australian Journal of Crop Science*, **4**,530-537.
- Sanoussi A, Ahoton LE, Odjo T.** 2012. Propagation of black plum (*Vitex donania* Sweet) using stem and root cuttings in the ecological conditions of South Benin. *Tropicultura*, **30**,107-112.
- The R Core Team.** 2013. R: A language and environment for statistical computing. Vienna: R Foundation for Statistical Computing.
- Thomas P, Schiefelbein WJ.** 2004. Roles of leaf in regulation of root and shoot growth from single node softwood cuttings of grape (*Vitis vinifera*). *Annales of Applied Biology*, **144**,27-37. <http://dx.doi.org/10.1111/j.1744-7348.2004.tb00313.x>
- Tipu SU, Hossain KL, Islam MO, Hossain MA.** 2006. Effect of pruning height on shoot biomass yield of *Leucaena leucocephala*. *Asian Journal of Plant Sciences*, **5**,1043-1046. <https://doi.org/10.3923/ajps.2006.1043.1046>
- Wilson PJ.** 1988. Adventitious rooting in stem cuttings of *Eucalyptus grandis* Hill ex Maid. University of Natal, Pietermaritzburg,

- Wilson PJ.** 1994. Contributions of the leaves and axillary shoots to rooting in *Eucalyptus grandis* Hill ex Maid, stem cuttings. *Journal of Horticultural Science*, **69**,999-1007.  
<http://dx.doi.org/10.1080/00221589.1994.11516538>
- Yasui H, Fujie I.** 1971. Studies on the productive structure of Shirakashi (*Cyclobalanopsis myrsinaefolia* Oerst.) coppice-forest managed by selection method. 8. On the growth and biomass of Shirakashi coppice managed by the clear-felling system. *Bulletin of the Faculty of Agriculture, Shimane University*, 49-55.
- Zeder MA.** 2015. Core questions in domestication research. *Proceedings of the National Academy of Sciences of the United States of America*, **112**,3191-3198.  
<http://dx.doi.org/10.1073/pnas.1501711112>

## Tables

Table 1. Coppicing and fertilization treatments applied to *Vitex doniana* seedlings

| Coppicing height                                                                 | Fertilization rate (goat manure) |                |                |                |
|----------------------------------------------------------------------------------|----------------------------------|----------------|----------------|----------------|
|                                                                                  | 0 kg                             | 0.5 kg<br>(D1) | 1.0 kg<br>(D2) | 1.5 kg<br>(D3) |
| Combinations (Treatments)                                                        |                                  |                |                |                |
| No coppicing (C00)                                                               | C00D0                            | -              | -              | -              |
| Light thinning : removal of leaves from main stem but leaving crown intact (C01) | C01D0                            | -              | -              | -              |
| 0.2 m above ground (C20)                                                         | -                                | C20D1          | C20D2          | C20D3          |
| 0.4 m above ground (C40)                                                         | -                                | C40D1          | C40D2          | C40D3          |

Table 2. Mean number of sprouts per initial basal stem diameter class before clear-cutting (IBSD-C)

| IBSD-C classes<br>(mm) | Days after pruning |             |             |             |             |             |
|------------------------|--------------------|-------------|-------------|-------------|-------------|-------------|
|                        | 10                 | 20          | 30          | 40          | 50          | 60          |
| 10-25                  | 2.47 ± 2.39        | 3.26 ± 2.26 | 3.45 ± 2.4  | 3.64 ± 2.32 | 3.71 ± 2.3  | 3.76 ± 2.13 |
| 25-30                  | 3.00 ± 2.31        | 3.69 ± 2.71 | 4.20 ± 2.97 | 4.23 ± 2.97 | 4.44 ± 2.97 | 4.42 ± 2.77 |
| ≥30                    | 3.23 ± 2.97        | 4.02 ± 2.90 | 4.38 ± 2.79 | 4.44 ± 2.72 | 4.73 ± 2.83 | 5.00 ± 2.71 |

### Figures legends

Fig. 1. Height of *V. doniana* saplings three months after transplanting and before treatments were applied

Fig. 2. Allometric relationship between stem basal diameter and stem height in young trees

Fig. 3. Sprouts growth in height two months after each pruning

Fig. 4. Mean growth rate of basal stem in diameter after clear-cutting and subsequent pruning. Refer to Table 1 for the definition of treatments

Fig. 5. Number of stump sprouts after coppicing, measured periodically.

Fig. 6. Growth in twigs length per stump height and manure rate, over 60 days after pruning. Refer to Table 1 for the definition of the treatments.

Fig. 7. Mean dry matter of edible biomass per treatment over the whole experiment

Fig. 8. Diameter at breast height (DBH) of 3 and 5 years old *V. doniana* trees

Fig. 9. Average basal stem diameter in three and five years old trees, per treatment

Fig. 10. Mean number of branches per tree over three and five years of woodlot management

483 Fig. 11. Average number of root suckers produced per tree per treatment, by three years and  
484 five years old trees

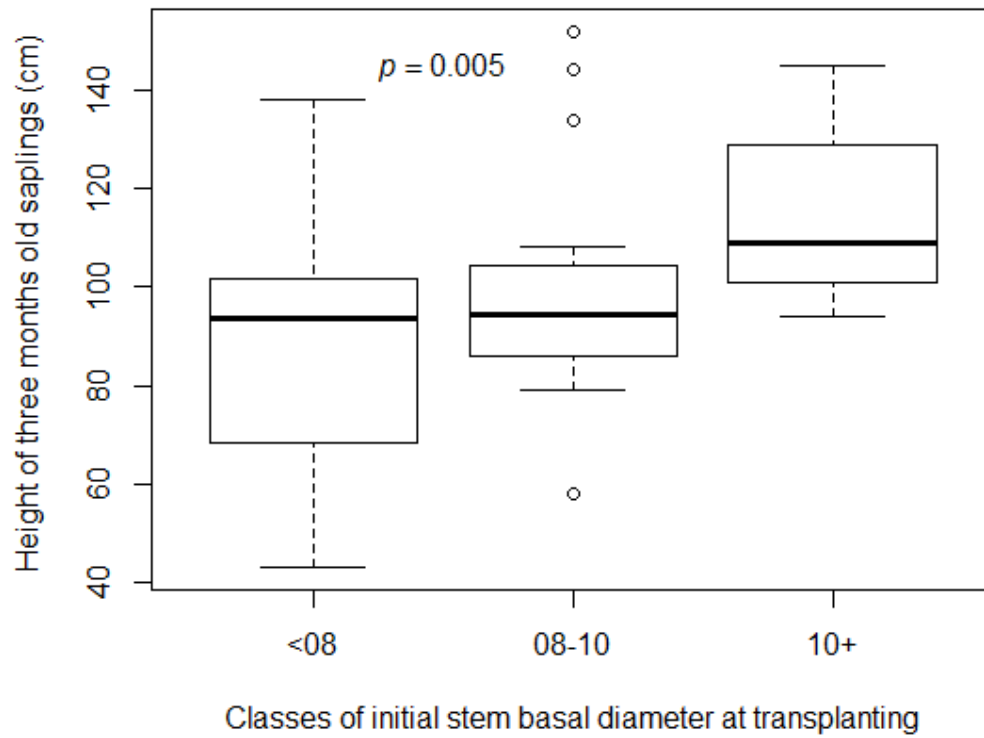

485

486 Fig. 1. Height of *V. doniana* saplings three months after transplanting and before treatments were applied

487



488

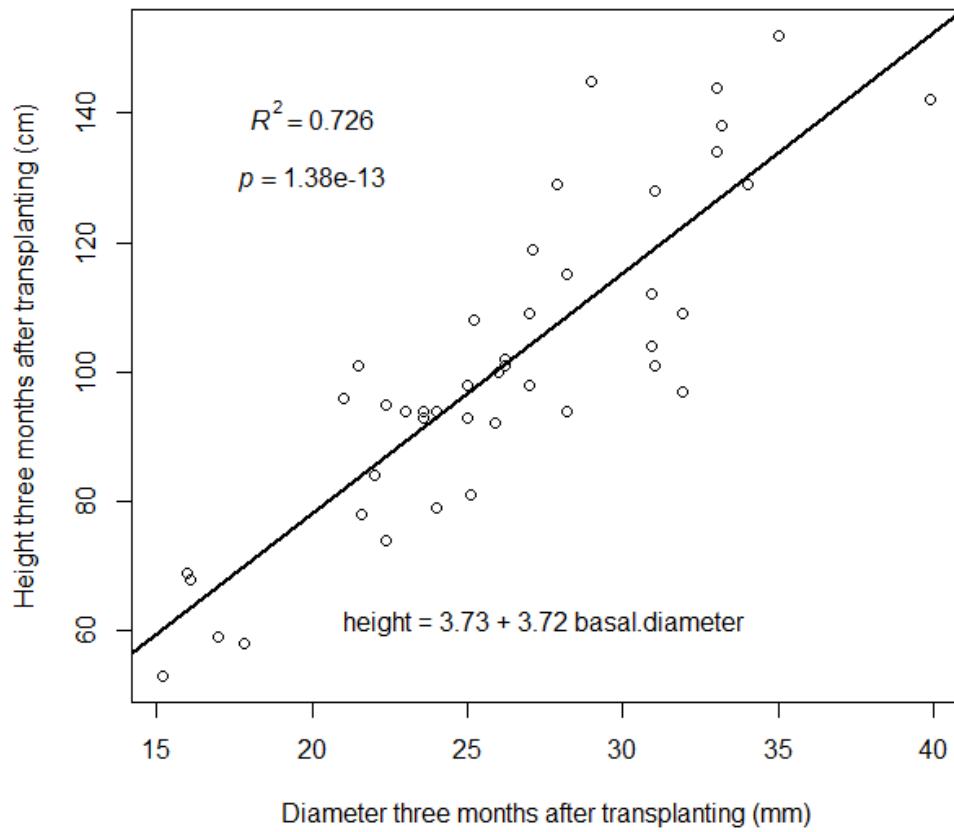

489

490 Fig. 2. Allometric relationship between stem basal diameter and stem height in young trees

491

492

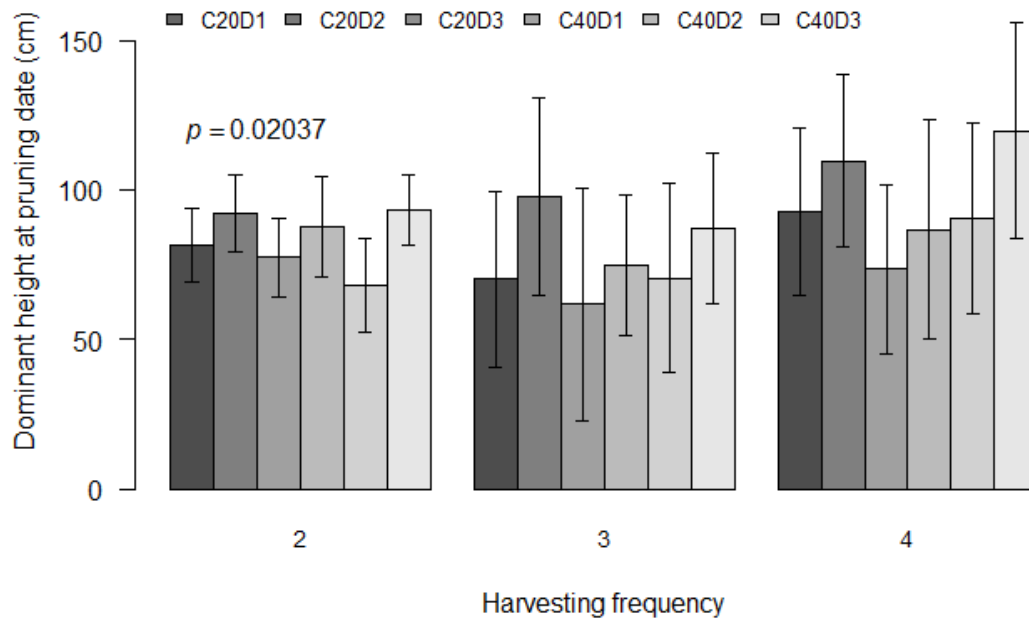

493

494 Fig. 3. Sprouts growth in height two months after each pruning

495

496

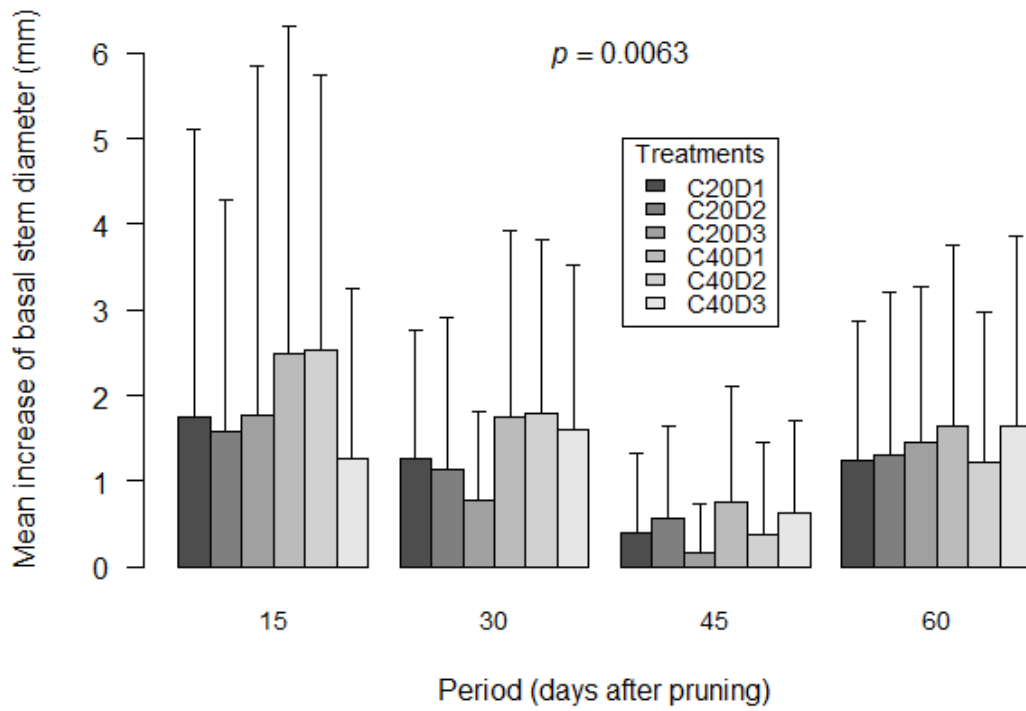

497

498

499

Fig. 4. Mean growth rate of basal stem in diameter after clear-cutting and subsequent pruning. Refer to Table 1 for the definition of treatments

500

501

502

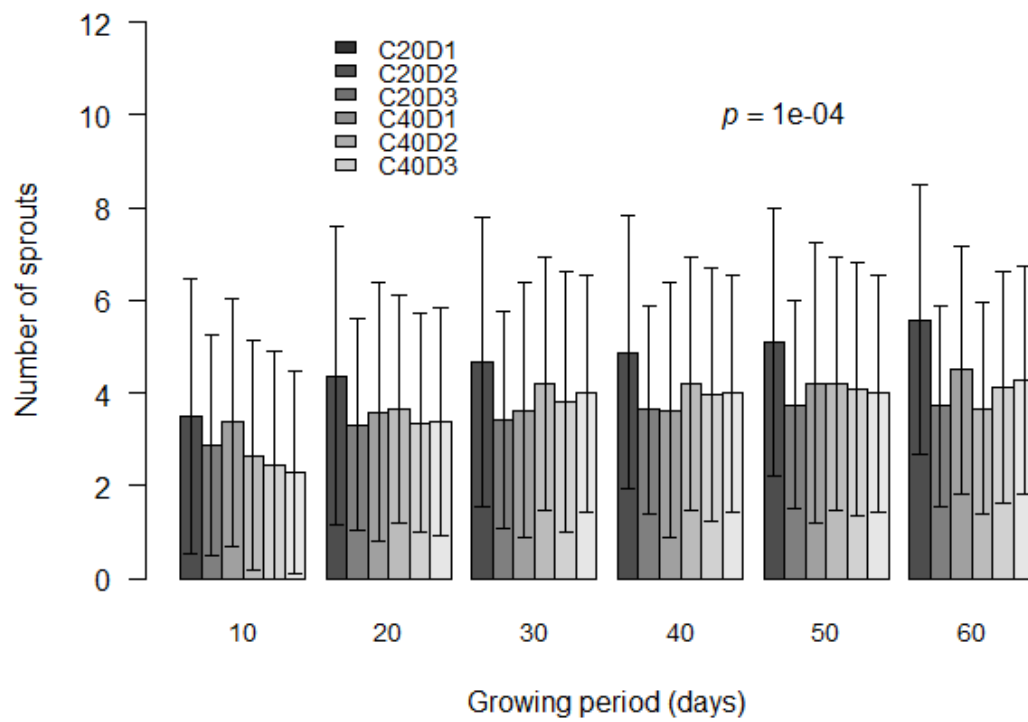

503

504 Fig. 5. Number of stump sprouts after coppicing, measured periodically.

505

506

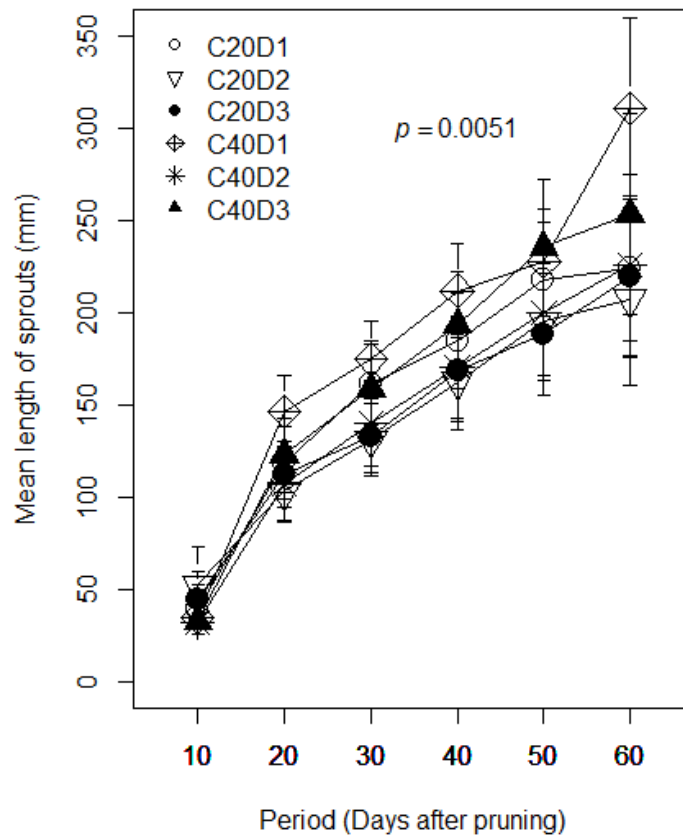

507

508 Fig. 6. Growth in twigs length per stump height and manure rate, over 60 days after pruning. Refer to Table 1  
509 for the definition of the treatments.

510

511

512

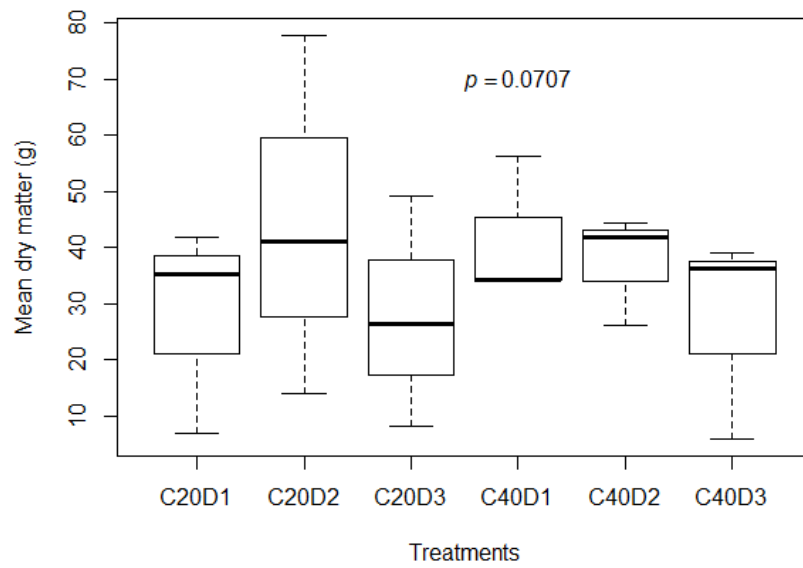

513

514 Fig. 7. Mean dry matter of edible biomass per treatment over the whole experiment

515

516

517

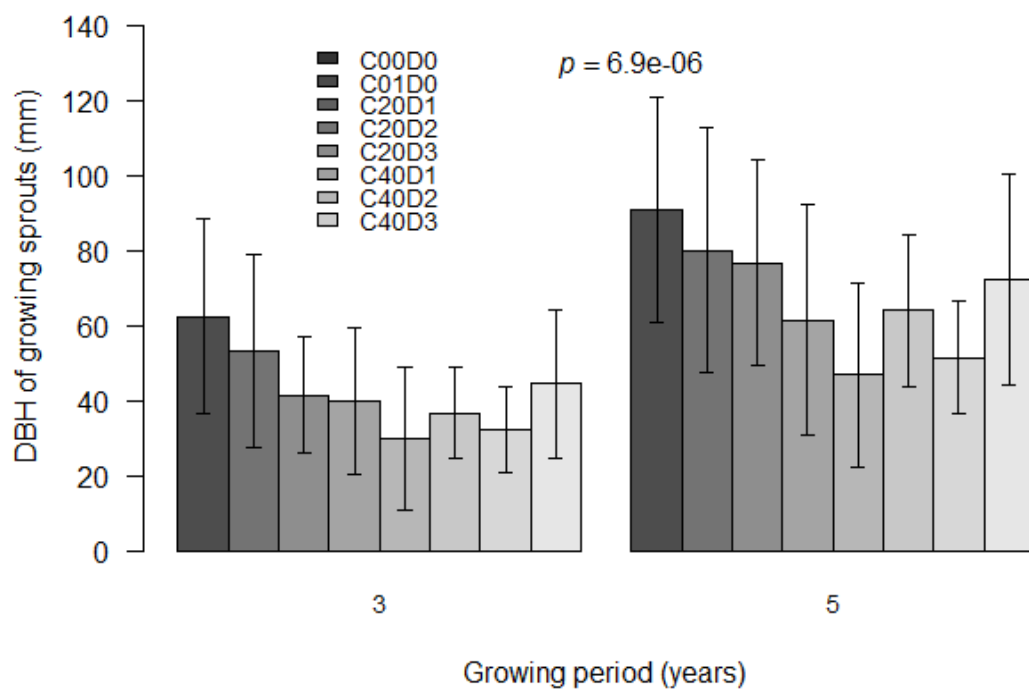

518

519 Fig. 8. Diameter at breast height (DBH) of 3 and 5 years old *V. doniana* trees

520

521

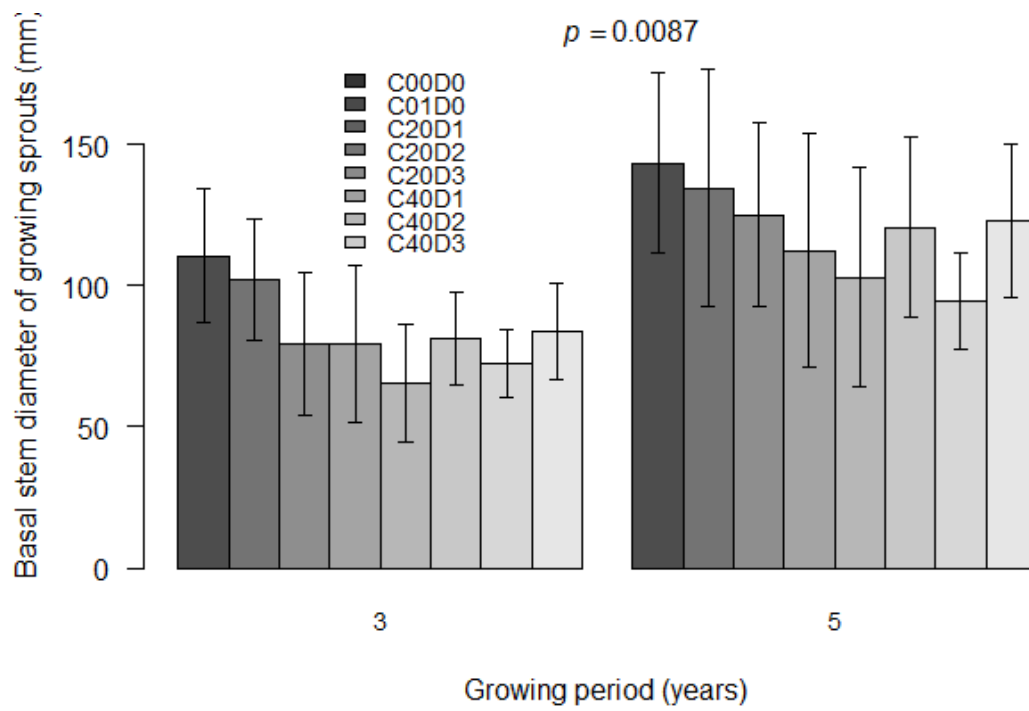

522

523

Fig. 9. Average basal stem diameter in three and five years old trees, per treatment



524

525

526

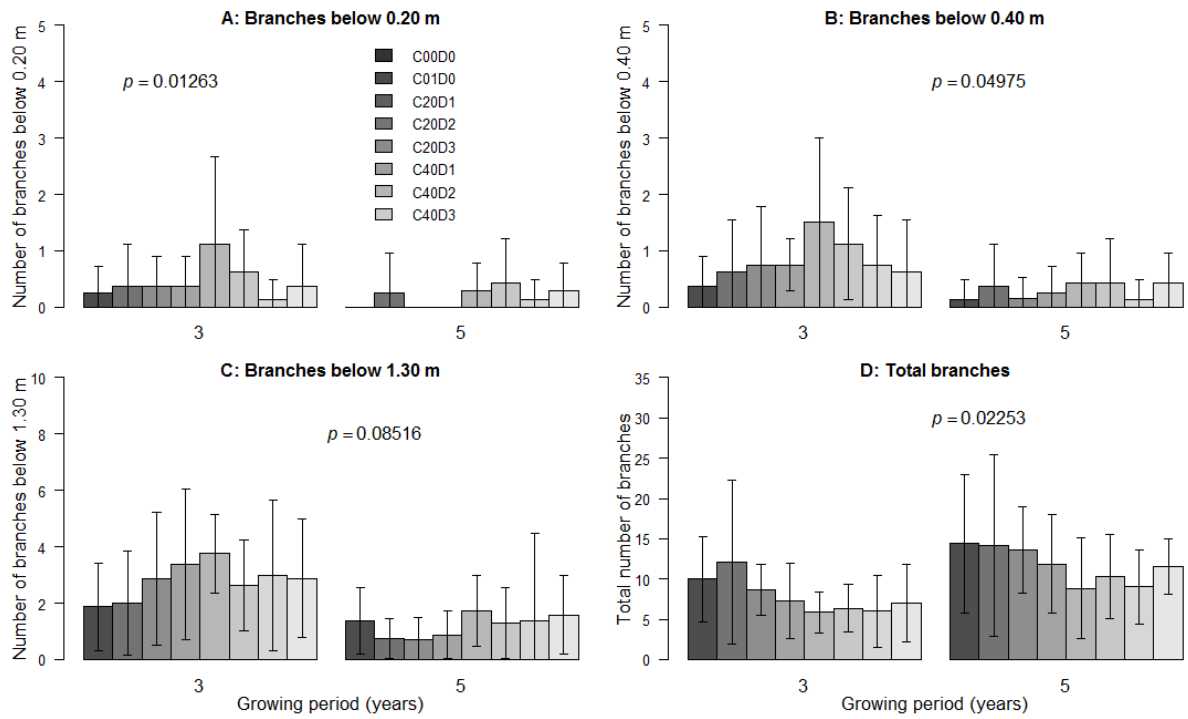

527

528 Fig. 10. Mean number of branches per tree over three and five years of woodlot management

529

530

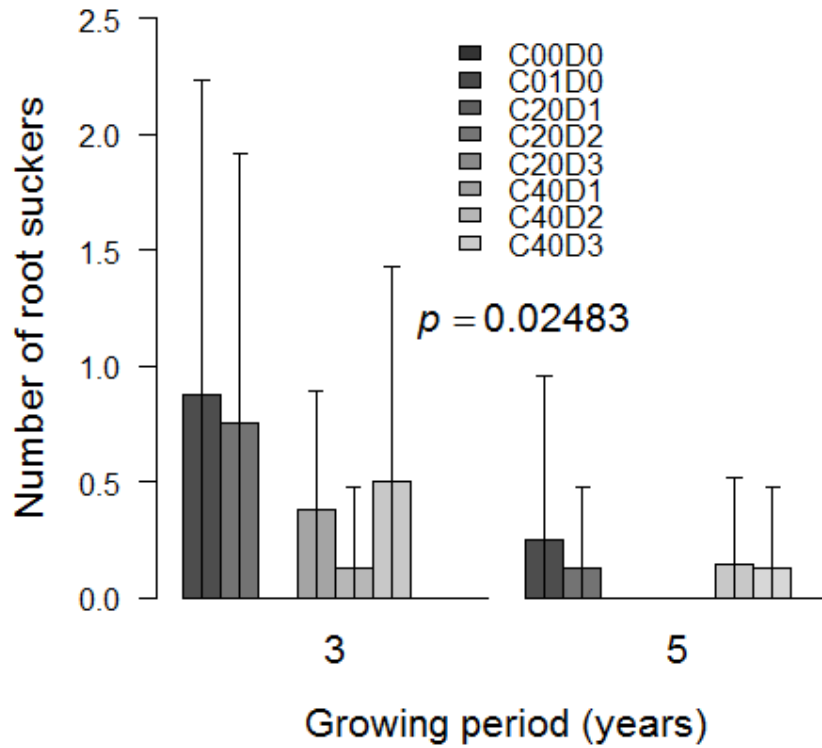

531

532 Fig. 11. Average number of root suckers produced per tree per treatment, by three years and five years old  
533 trees.

534

535
